# Supplementary material
Source: PubMed Central journal article supplement (PMC5526774)
Supplement: NIHMS865358-supplement-10.pdf [file NIHMS865358-supplement-10.pdf]

**Table S1.  $\beta_2$ AR/GRK5 inter-chain BS<sup>3</sup> and zero-length cross-links, Related to Figures 5 and 6**

Validated cross-linked peptides between  $\beta_2$ AR and GRK5 are listed and grouped based on the interface. Cross-linked residue in peptide sequence is highlighted in bold.

| Domains ( $\beta_2$ AR/GRK5) | Cross-linker type | Charge (z) | Obs. MH+ (Da) | Mass error (ppm) | $\beta_2$ AR sequence | GRK5 sequence     | Cross-linked residues ( $\beta_2$ AR-GRK5) | C $\alpha$ -C $\alpha$ distances in 1 <sup>st</sup> model (Å) | C $\alpha$ -C $\alpha$ distances in 2 <sup>nd</sup> model (Å) | C $\alpha$ -C $\alpha$ distances in 3 <sup>rd</sup> model (Å) |
|------------------------------|-------------------|------------|---------------|------------------|-----------------------|-------------------|--------------------------------------------|---------------------------------------------------------------|---------------------------------------------------------------|---------------------------------------------------------------|
| <b>Cluster 1</b>             |                   |            |               |                  |                       |                   |                                            |                                                               |                                                               |                                                               |
| ICL3/NLBD                    | BS <sup>3</sup>   | 4          | 1674.89       | 0.70             | VFQEAKR               | EGGGGKR           | 227-22                                     | 10.5                                                          | 12.7                                                          | 13.8                                                          |
| ICL3/NLBD                    | BS <sup>3</sup>   | 3          | 1669.92       | -0.03            | QLQKIDK               | EGGGGKR           | 232-22                                     | 13.5                                                          | 13.2                                                          | 15.1                                                          |
| ICL3/NLBD                    | BS <sup>3</sup>   | 4          | 1798.02       | 1.31             | QLQKIDK               | EGGGGKRK          | 232-22                                     | 13.5                                                          | 13.2                                                          | 15.1                                                          |
| ICL3/NLBD                    | BS <sup>3</sup>   | 3          | 1273.71       | 0.69             | QLQKIDK               | <b>KGK</b>        | 232-24                                     | 14.2                                                          | 8.3                                                           | 9.1                                                           |
| ICL3/NLBD                    | BS <sup>3</sup>   | 3          | 1497.91       | 0.84             | QLQKIDK               | <b>RKGK</b>       | 232-24                                     | 14.2                                                          | 8.3                                                           | 9.1                                                           |
| ICL3/NLBD                    | BS <sup>3</sup>   | 4          | 1601.83       | 0.53             | IDKSEGR               | EGGGGKR           | 235-22                                     | 15.7                                                          | 13.5                                                          | 15.8                                                          |
| ICL3/NLBD                    | BS <sup>3</sup>   | 3          | 1273.71       | 0.69             | IDKSEGR               | <b>KGK</b>        | 235-24                                     | 15.7                                                          | 10                                                            | 10.6                                                          |
| ICL3/NLBD                    | BS <sup>3</sup>   | 4          | 1655.94       | -0.27            | IDKSEGR               | <b>KGLLQR</b>     | 235-548                                    | + <sup>ND</sup>                                               | + <sup>ND</sup>                                               | + <sup>ND</sup>                                               |
| ICL3/CLBD                    | zero-length       | 4          | 2352.25       | 0.45             | .NLSQVEQDGR           | <b>KGLLQR</b>     | 249-547                                    | + <sup>ND</sup>                                               | + <sup>ND</sup>                                               | + <sup>ND</sup>                                               |
| <b>Cluster 2</b>             |                   |            |               |                  |                       |                   |                                            |                                                               |                                                               |                                                               |
| ICL2/RH-bundle               | BS <sup>3</sup>   | 4          | 3138.72       | -1.54            | YFAITSPFKYQSLLTK      | IMTKYLTPK         | 140-108                                    | 61.7                                                          | 29.6                                                          | 15.9                                                          |
| ICL2/RH-bundle               | BS <sup>3</sup>   | 4          | 2326.31       | -1.15            | YQSLLTKNK             | IMTKYLTPK         | 147-108                                    | 70.1                                                          | 37.2                                                          | 29.3                                                          |
| <b>Cluster 3</b>             |                   |            |               |                  |                       |                   |                                            |                                                               |                                                               |                                                               |
| C-term/Cat. domain           | BS <sup>3</sup>   | 6          | 5226.47       | 2.56             | SSLKAYGNGY.           | MYACKR            | 348-215                                    | + <sup>ND</sup>                                               | + <sup>ND</sup>                                               | + <sup>ND</sup>                                               |
| C-term/Cat. domain           | BS <sup>3</sup>   | 6          | 7895.83       | 8.85             | .EKENKLLAED.          | QYRVLGK           | 375-194                                    | + <sup>ND</sup>                                               | + <sup>ND</sup>                                               | + <sup>ND</sup>                                               |
| C-term/Cat. domain           | BS <sup>3</sup>   | 5          | 5060.39       | -1.86            | .YHVEQEKENK           | QPVTKNTFR         | 372-183                                    | + <sup>ND</sup>                                               | + <sup>ND</sup>                                               | + <sup>ND</sup>                                               |
| C-term/Cat. domain           | BS <sup>3</sup>   | 5          | 4534.15       | 1.48             | .QGPYHVEQEK           | MLLTKDAK          | 372-426                                    | + <sup>ND</sup>                                               | + <sup>ND</sup>                                               | + <sup>ND</sup>                                               |
| C-term/Cat. domain           | zero-length       | 4          | 4646.03       | -2.99            | .SNGNTGEQSG           | .FSTVKGVNLD.      | 362-487                                    | + <sup>ND</sup>                                               | + <sup>ND</sup>                                               | + <sup>ND</sup>                                               |
| <b>Others</b>                |                   |            |               |                  |                       |                   |                                            |                                                               |                                                               |                                                               |
| ICL2/Cat. domain             | BS <sup>3</sup>   | 4          | 2322.28       | 1.60             | YQSLLTKNK             | QPVTKNTFR         | 147-183                                    | 15.2                                                          | 25.9                                                          | 26.4                                                          |
| ICL3/Cat. domain             | BS <sup>3</sup>   | 5          | 4015.97       | 1.44             | VFQEAKR               | .FSTVKGVNLD.      | 227-487                                    | 43.2                                                          | 48.2                                                          | 48.9                                                          |
| ICL3/Cat. domain             | BS <sup>3</sup>   | 5          | 4011.96       | -5.05            | QLQKIDK               | .FSTVKGVNLD.      | 232-487                                    | 40.2                                                          | 46.6                                                          | 47.5                                                          |
| ICL3/Cat. domain             | BS <sup>3</sup>   | 3          | 2048.04       | 2.04             | IDKSEGR               | <b>KGESMALNEK</b> | 235-226                                    | 52.6                                                          | 45.8                                                          | 45                                                            |
| ICL3/RH-bundle               | BS <sup>3</sup>   | 4          | 2036.11       | -0.15            | IDKSEGR               | IMTKYLTPK         | 235-108                                    | 43.1                                                          | 43                                                            | 31.2                                                          |
| C-term/CLBD                  | BS <sup>3</sup>   | 5          | 5181.51       | 7.30             | SSLKAYGNGY.           | RQHQNNSK          | 348-564                                    | + <sup>ND</sup>                                               | + <sup>ND</sup>                                               | + <sup>ND</sup>                                               |
| C-term/RH-bundle             | BS <sup>3</sup>   | 5          | 4669.34       | 2.26             | ENKLLAEDLP.           | IMTKYLTPK         | 375-108                                    | + <sup>ND</sup>                                               | + <sup>ND</sup>                                               | + <sup>ND</sup>                                               |
| C-term/NLBD                  | zero-length       | 3          | 2304.98       | 1.95             | .SNGNTGEQSG           | EGGGGKR           | 362-22                                     | + <sup>ND</sup>                                               | + <sup>ND</sup>                                               | + <sup>ND</sup>                                               |

+<sup>ND</sup> C $\alpha$ -C $\alpha$  distance is not determined (ND) due to absence of atomic coordinates of one or two cross-linked domains, but the cross-link is plausible based on structural proximity of cross-linked domains in the model.
